# Supplementary material for: Effects of histone deacetylase inhibitor valproic acid on skeletal myocyte development
Source: PubMed Central journal article supplement — Sci Rep. 2014 Nov 26;4:7207. doi: 10.1038/srep07207 (PMC4244627; doi:10.1038/srep07207), 2014-11-26
Supplement: srep07207-s1.pdf [file srep07207-s1.pdf]

**Effects of histone deacetylase inhibitor valproic acid on skeletal myocyte development**

Qiao Li<sup>\*</sup>, Michelle Foote and Jihong Chen

<sup>\*</sup>Corresponding author: Q.L. (Qiao.Li@uOttawa.ca)

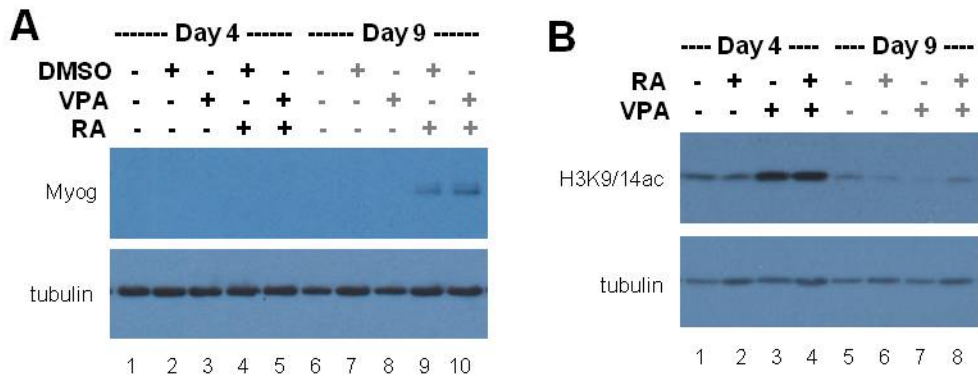

**Figure S1.** (A) The full-length Western blots of the Figure 2B. Cells were grown as EBs for 4 days and treated with DMSO (1%), RA (10 nM) or valproic acid (VPA, 0.5 mM). The cells were cultured for an additional 5 days without treatment. Myogenin protein expression was examined by Western blotting on day 4 and day 9 of differentiation. The blot was then stripped and reprobed for  $\beta$ -tubulin that serves as a loading control. (B) The full-length Western blots of the Figure 2C. The levels of H3K9/14 acetylation (H3K9/14ac) were examined by Western blotting. The blot was then stripped and reprobed for  $\beta$ -tubulin that serves as a loading control
